# Supplementary material for: Positive Welfare and the Like: Distinct Views and a Proposed Framework
Source: Front Vet Sci. 2020 Jul 2;7:370. doi: 10.3389/fvets.2020.00370 (PMC7343720; doi:10.3389/fvets.2020.00370)
Supplement: Supplementary file 1 [file Data_Sheet_1.xlsx]

## Sheet: Vienna framework plot
Facet	Value (1-low, 10-high)	Instructions for use: Allocate the value in column B for each facet, and edit the title of the plot figure for your topic
Frequency	10
Duration	4
Arousal	3
Context-specificity	8
Previous experience	2
Individual differences	8
Sense of agency	4
Long-term benefit	10

## Sheet: for internal use only
Sector Weight	% of 360°	Start Angle	Finish Angle	Chart Labels	0	1	2	3	4	5	6	7	8	9	10	11	12	13	14	15	16	17	18	19	20	21	22	23	24	25	26	27	28	29	30	31	32	33	34	35	36	37	38	39	40	41	42	43	44
1	0.125	0	46	Frequency	10	10	10	10	10	10	10	10	10	10	10	10	10	10	10	10	10	10	10	10	10	10	10	10	10	10	10	10	10	10	10	10	10	10	10	10	10	10	10	10	10	10	10	10	10
1	0.125	46	91	Duration	0	0	0	0	0	0	0	0	0	0	0	0	0	0	0	0	0	0	0	0	0	0	0	0	0	0	0	0	0	0	0	0	0	0	0	0	0	0	0	0	0	0	0	0	0
1	0.125	91	136	Arousal	0	0	0	0	0	0	0	0	0	0	0	0	0	0	0	0	0	0	0	0	0	0	0	0	0	0	0	0	0	0	0	0	0	0	0	0	0	0	0	0	0	0	0	0	0
1	0.125	136	181	Context-specificity	0	0	0	0	0	0	0	0	0	0	0	0	0	0	0	0	0	0	0	0	0	0	0	0	0	0	0	0	0	0	0	0	0	0	0	0	0	0	0	0	0	0	0	0	0
1	0.125	181	226	Previous experience	0	0	0	0	0	0	0	0	0	0	0	0	0	0	0	0	0	0	0	0	0	0	0	0	0	0	0	0	0	0	0	0	0	0	0	0	0	0	0	0	0	0	0	0	0
1	0.125	226	271	Individual differences	0	0	0	0	0	0	0	0	0	0	0	0	0	0	0	0	0	0	0	0	0	0	0	0	0	0	0	0	0	0	0	0	0	0	0	0	0	0	0	0	0	0	0	0	0
1	0.125	271	316	Sense of agency	0	0	0	0	0	0	0	0	0	0	0	0	0	0	0	0	0	0	0	0	0	0	0	0	0	0	0	0	0	0	0	0	0	0	0	0	0	0	0	0	0	0	0	0	0
1	0.125	316	361	Long-term benefit	10	0	0	0	0	0	0	0	0	0	0	0	0	0	0	0	0	0	0	0	0	0	0	0	0	0	0	0	0	0	0	0	0	0	0	0	0	0	0	0	0	0	0	0	0
[truncated: 316 more columns]
